# Supplementary material for: Occurrence, Diversity, and Host Association of Intestinal Campylobacter, Arcobacter, and Helicobacter in Reptiles
Source: PLoS One. 2014 Jul 2;9(7):e101599. doi: 10.1371/journal.pone.0101599 (PMC4079654; doi:10.1371/journal.pone.0101599)
Supplement: Table S2 — GenBank accession numbers of the 16S rRNA sequences for all putative novel Epsilonproteobacteria taxa isolated during this study. *, 16S rRNA sequence deposited at GenBank prior to this study. (XLSX) [file pone.0101599.s002.xlsx]

## Sheet: Sheet1
Taxon	Strain	Host species	Accession number
Campylobacter taxon 1	2463D	Iguana iguana	KF425532*
	1485E	Pogona vitticeps	KF425533*
	12S02285-1	Sauromalus ater	KF787891
	12S02842-24	Aldabrachelys gigantea	KF787892
	13S00387-3	Chelonoidis carbonaria	KF787893
Campylobacter taxon 2	11S02629-5	Testudo graeca	KJ081202
Campylobacter fetus taxon 1	85-388	Terrapene carolina	AY621302*
	03-427	Homo sapiens	AY621303*
Campylobacter fetus taxon 2	12S01208-4	Chelonoidis carbonaria	KJ081203
Helicobacter taxon 1	11S02596-1	Varanus acanthurus	KJ081204
Helicobacter taxon 2	11S02629-2	Testudo graeca	KJ081205
Helicobacter taxon 3	11S03491-1	Eublepharis macularius	KJ081206
Helicobacter taxon 4	12S02232-10	Cyclura cornuta	KJ081207
Helicobacter taxon 5	12S02256-12	Cordylus warreni	KJ081208
Helicobacter taxon 6	12S02634-8	Tupinambis merianae	KJ081209
Helicobacter taxon 7	13S00482-2	Takydromus sexlineatus	KJ081210
Sulfurospirillum taxon	11S05485-2	Orlitia borneensis	KJ081211
